# Supplementary material for: A novel cyclic non-ligand dual-cloud point extraction for the preconcentration of cadmium(ii) through pH regulation in food and environmental matrices
Source: Royal Society of Chemistry journal article supplement (doi:10.1039/c5nj01426c), 2015-01-01
Supplement: c5nj01426c1.pdf [file c5nj01426c1.pdf]

## Supporting Information

### **Cyclic thermosensitive polymer dual-cloud point extraction of cadmium(II) with pH-mediated system in biological and environmental matrices**

Yun Wang<sup>a\*</sup>, Hui Chen<sup>a</sup>, Juan Han<sup>b\*</sup>, Lei Wang<sup>a</sup>, Liang Ni<sup>a</sup>, Xu Tang<sup>a</sup>

<sup>a</sup>School of Chemistry and Chemical Engineering, Jiangsu University, Zhenjiang  
212013, People's Republic of China.

<sup>b</sup>School of Food and Biological Engineering, Jiangsu University, Zhenjiang 212013,  
People's Republic of China.

\*Corresponding author,

Yun Wang, Tel.: +86 051188780201; fax: +86 051188791800; E-mail Address:

yunwang@ujs.edu.cn

Juan Han, Tel.: +86 051188790683; fax: +86 051188791800; E-mail Address:

hanjuan@ujs.edu.cn

## **Summary**

This supporting information file includes additional results and information as described in the text of the main article including the following topics: 1) The BBD design and results of real experiments; 2) Effect of the concentration of L31(%); 3) Relationship between surface tension and concentration of L31 at different temperature; 4) Effect of the equilibrium temperature on the NL-DCPE; 5) Effect of the incubation time on the NL-DCPE; 6) Response surfaces plots for Cd(II) extraction in NL-DCPE.

**Table S-1**

BBD experiment design and result for the optimization of the experimental conditions of NL-DCPE

| Run | One CPE pH             | Second CPE pH | L31 concentration (%) | Extraction rate (%) |
|-----|------------------------|---------------|-----------------------|---------------------|
| 1   | 12.5 (-1) <sup>a</sup> | 2 (-1)        | 30 (0)                | 44                  |
| 2   | 13 (0)                 | 2 (-1)        | 35 (1)                | 37                  |
| 3   | 13 (0)                 | 4 (1)         | 35 (1)                | 43                  |
| 4   | 13 (0)                 | 3 (0)         | 30 (0)                | 90                  |
| 5   | 13 (0)                 | 3 (0)         | 30 (0)                | 96                  |
| 6   | 13.5 (1)               | 3 (0)         | 35 (1)                | 78                  |
| 7   | 12.5 (-1)              | 3 (0)         | 25 (-1)               | 36                  |
| 8   | 13 (0)                 | 3 (0)         | 30 (0)                | 93                  |
| 9   | 13.5 (1)               | 4 (1)         | 30 (0)                | 69                  |
| 10  | 12.5 (-1)              | 4 (1)         | 30 (0)                | 50                  |
| 11  | 12.5 (-1)              | 3 (0)         | 35 (1)                | 41                  |
| 12  | 13 (0)                 | 3 (0)         | 30 (0)                | 90                  |
| 13  | 13.5 (1)               | 3 (0)         | 25 (-1)               | 53                  |
| 14  | 13 (0)                 | 3 (0)         | 30 (0)                | 89                  |
| 15  | 13 (0)                 | 2 (-1)        | 25 (-1)               | 30                  |
| 16  | 13.5 (1)               | 2 (-1)        | 30 (0)                | 65                  |
| 17  | 13 (0)                 | 4 (1)         | 25 (-1)               | 35                  |

<sup>a</sup>Numbers in brackets are the coded values of the independent variables in the experimental design

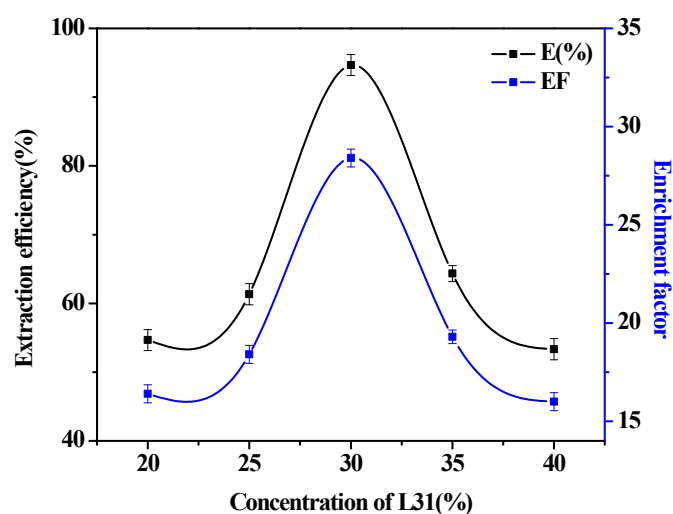

**Fig.S-1.** Effect of the concentration of L31(%). one CPE pH: 13.33; second CPE pH: 3.05; equilibrium temperature: 70 °C; incubation time: 10 min; error bars represent ± S.D. for three replicates.

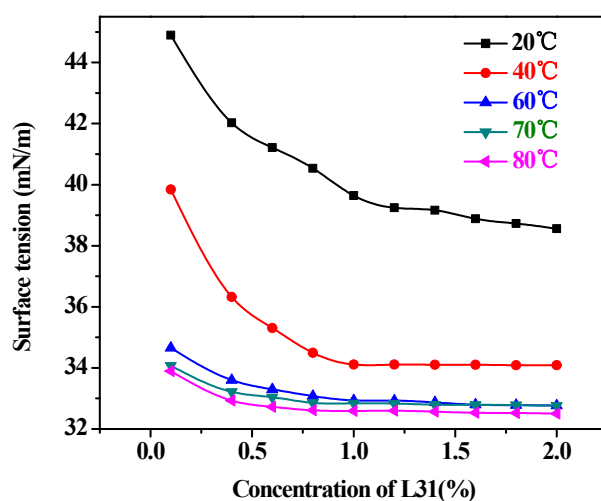

**Fig.S-2.** Relationship between surface tension and concentration of L31 at different temperature. The CMC of 20 °C, 40 °C, 60 °C, 70 °C, 80 °C were 9.3 mM, 8.81 mM, 8.35 mM, 8.33 mM, 8.30 mM, respectively.

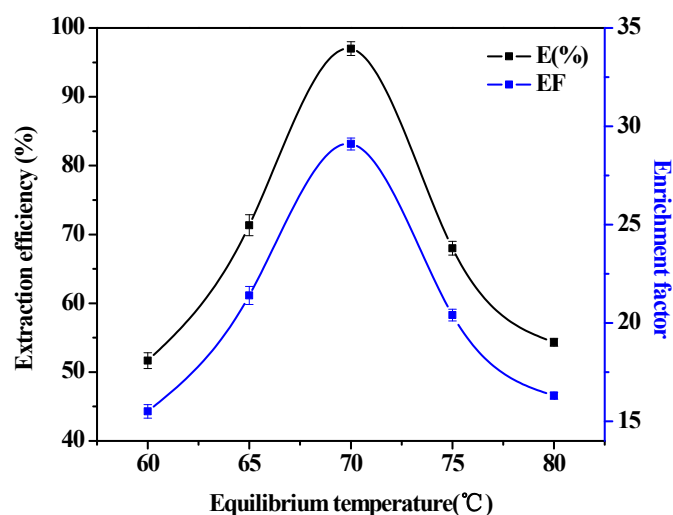

**Fig.S-3.** Effect of the equilibrium temperature on the NL-DCPE. concentration of L31: 3%; one CPE pH: 13.33; second CPE pH: 3.05; incubation time: 10 min; error bars represent  $\pm$  S.D. for three replicates.

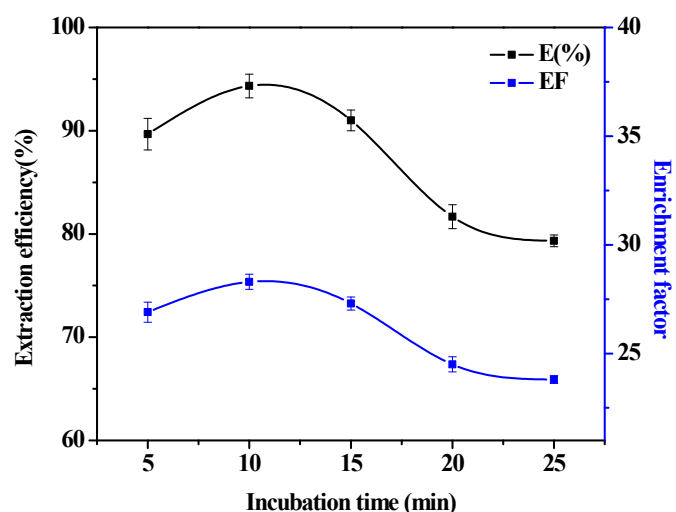

**Fig.S-4.** Effect of the incubation time on the NL-DCPE. concentration of L31: 3%; one CPE pH: 13.33; second CPE pH: 3.05; equilibrium temperature: 70 °C; incubation time: 10 min; error bars represent ± S.D. for three replicates.

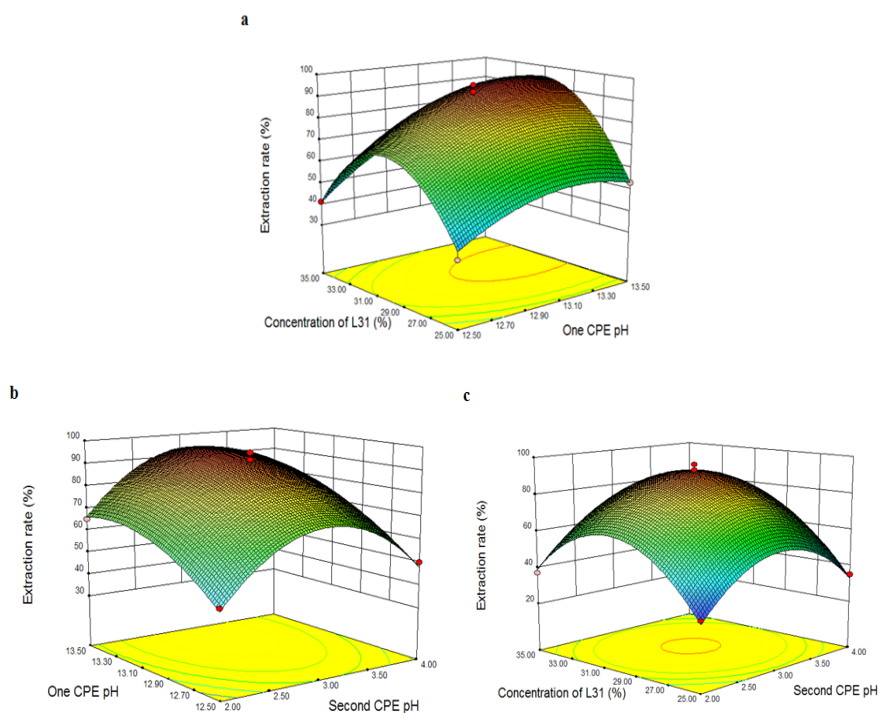

**Fig.S-5.** Response surfaces plots for Cd(II) extraction in NL-DCPE as a function of (a) concentration of L31 and one CPE pH, (b) one CPE pH and second CPE pH, (c) concentration of L31 and second CPE pH.
